# Supplementary material for: Fish embryo toxicity assessment of o-dianisidine in Clarias gariepinus and its electrochemical treatment in aquatic samples using super conductive carbon black
Source: Royal Society of Chemistry journal article supplement (doi:10.1039/c6ra00158k), 2016-01-01
Supplement: c6ra00158k1.pdf [file c6ra00158k1.pdf]

## Electronic Supplementary Information

### Fish Embryo Toxicity Assessment of *o*-dianisidine in *Clarias gariepinus* and its Electrochemical Treatment in Aquatic Samples using Superconductive Carbon Black †

Sundaram Sornambikai,<sup>a</sup> Lim Qing Hin,<sup>b</sup> Kasi Marimuthu\*<sup>b</sup> and Mohammed Rafiq Abdul Kadir \*\*<sup>a</sup>

<sup>a</sup>Medical Devices & Technology Group, Faculty of Biosciences & Medical Engineering, Universiti Teknologi Malaysia, 81310 UTM Johor Bahru, Johor, Malaysia.

<sup>b</sup>Department of Biotechnology, Faculty of Applied Sciences, AIMST University, Bedong, Kedah Darul Aman, Malaysia.

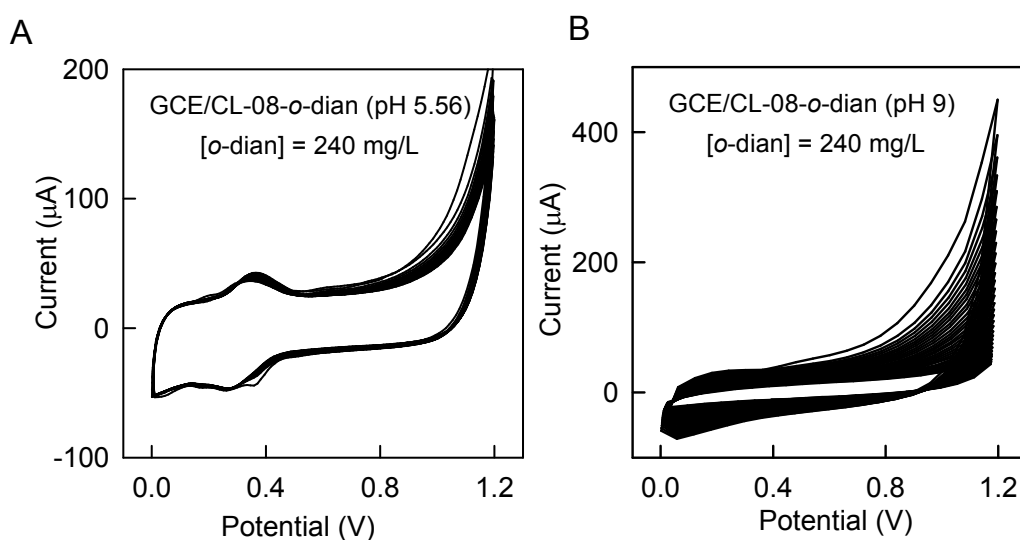

**Figure S1.** Cyclic voltammograms of the GCE/CL-08 in the presence of *o*-dian at (A) pH 5.56 and (B) pH 9 PBS. Experimental conditions:  $n=50$ ,  $v = 50$  mV/s and  $[o\text{-dian}] = 240$  mg/L.

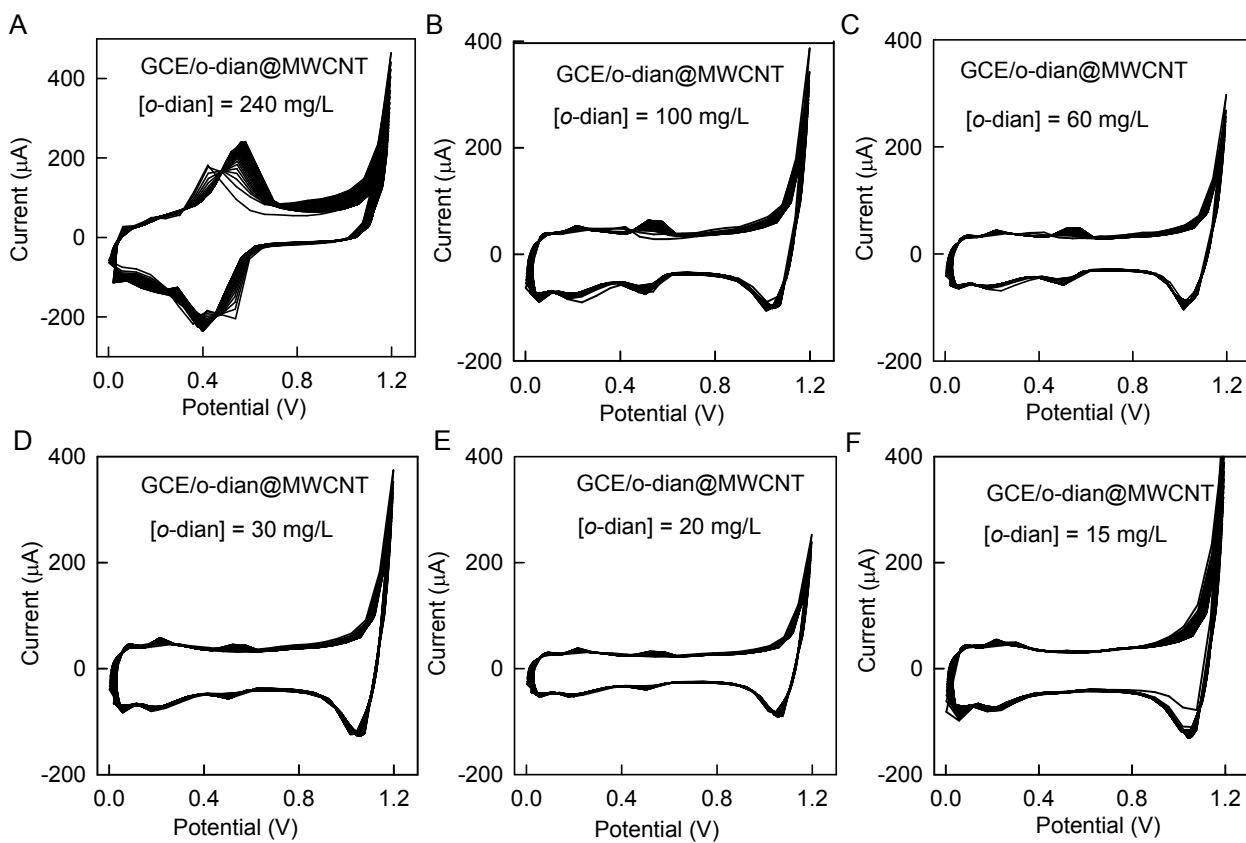

**Figure S2.** Cyclic voltammograms of the GCE/MWCNT for the uptake and electrochemical treatment of *o*-dian at different concentrations in pH 2 PBS,  $\nu = 50 \text{ mV/s}$  vs Ag/AgCl.
